# Supplementary figures and images for: Identification and characterization of a T-2 toxin-producingFusarium poaestrain and the anti-tumor effect of the T-2 toxin on human hepatoma cell line SMMC-7721
Source: Royal Society of Chemistry journal article supplement (doi:10.1039/c8ra09967g), 2019-01-01

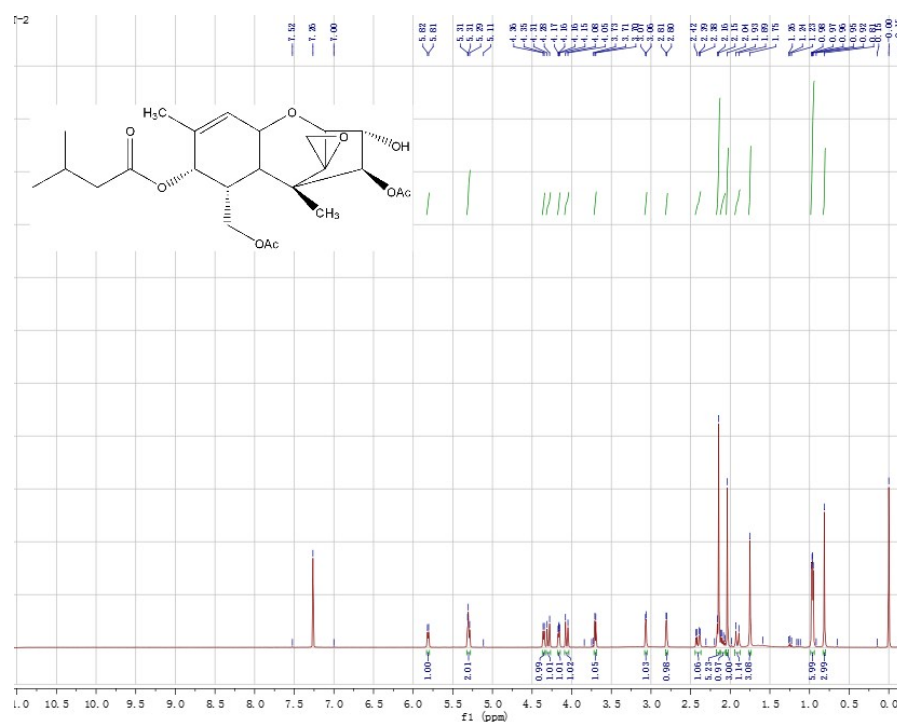

**Fig S1. The NMR spectra (D<sub>2</sub>O, 600 MHz) of the T-2 toxin.**

Supplement: c8ra09967g1.pdf [file c8ra09967g1.pdf]
